# Supplementary material for: Syntheses, structures, and properties of six new coordination polymers constructed from N-heterocyclic multicarboxylic acids
Source: Royal Society of Chemistry journal article supplement (doi:10.1039/c4ra00180j), 2014-01-01
Supplement: c4ra00180j.pdf [file c4ra00180j.pdf]

## Supporting information

### Syntheses, Structures, and Properties of Six New Coordination polymers Constructed by N-heterocyclic Multicarboxylic Acids

Fang-Fang Li, Qin-Qin Zhang, Yan-Yan Zhao, Shu-Xin Jiang, Xue-Ying Shi, Jian-Zhong Cui\* and Hong-ling Gao\*

Department of Chemistry, School of Science, Tianjin University, and Collaborative Innovation Center of Chemical Science  
and Engineering (Tianjin), Tianjin 300072, China

**Table S1** Selected bond lengths (Å) and angles (°) for  $\{[\text{Zn}_2(\text{Hpdtc})_2(\text{Hbpe})_2] \cdot 5\text{H}_2\text{O}\}$  (**1**)

|                   |            |                   |            |
|-------------------|------------|-------------------|------------|
| Zn(1)-O(9)        | 1.959(2)   | Zn(2)-O(3)        | 1.971(2)   |
| Zn(1)-N(3)        | 2.024(2)   | Zn(2)-N(5)        | 2.025(2)   |
| Zn(1)-N(1)        | 2.048(2)   | Zn(2)-N(2)        | 2.048(2)   |
| Zn(1)-O(1)        | 2.133(2)   | Zn(2)-O(14)       | 2.102(2)   |
| Zn(1)-O(8)        | 2.144(2)   | Zn(2)-O(15)       | 2.132(2)   |
| O(9)-Zn(1)-N(3)   | 102.05(9)  | O(9)-Zn(1)-N(1)   | 124.34(9)  |
| N(3)-Zn(1)-N(1)   | 133.59(10) | O(9)-Zn(1)-O(1)   | 103.38(9)  |
| N(3)-Zn(1)-O(1)   | 94.37(9)   | N(1)-Zn(1)-O(1)   | 77.37(9)   |
| O(9)-Zn(1)-O(8)   | 93.11(9)   | N(3)-Zn(1)-O(8)   | 102.61(9)  |
| N(1)-Zn(1)-O(8)   | 76.02(9)   | O(1)-Zn(1)-O(8)   | 153.33(8)  |
| O(3)-Zn(2)-N(5)   | 103.86(9)  | O(3)-Zn(2)-N(2)   | 131.20(9)  |
| N(5)-Zn(2)-N(2)   | 124.89(10) | O(3)-Zn(2)-O(14)  | 94.16(9)   |
| N(5)-Zn(2)-O(14)  | 100.04(9)  | N(2)-Zn(2)-O(14)  | 76.80(9)   |
| O(3)-Zn(2)-O(15)  | 102.72(8)  | N(5)-Zn(2)-O(15)  | 95.12(9)   |
| N(2)-Zn(2)-O(15)  | 77.10(9)   | O(14)-Zn(2)-O(15) | 153.90(8)  |
| C(1)-O(1)-Zn(1)   | 116.47(18) | C(8)-O(3)-Zn(2)   | 132.06(19) |
| C(7)-O(8)-Zn(1)   | 116.04(18) | C(18)-O(9)-Zn(1)  | 138.01(19) |
| C(10)-O(14)-Zn(2) | 116.45(18) | C(16)-O(15)-Zn(2) | 115.97(18) |
| C(6)-N(1)-Zn(1)   | 120.02(19) | C(15)-N(2)-Zn(2)  | 117.8(2)   |
| C(2)-N(1)-Zn(1)   | 116.77(19) | C(11)-N(2)-Zn(2)  | 118.9(2)   |
| C(19)-N(3)-Zn(1)  | 123.1(2)   | C(31)-N(5)-Zn(2)  | 122.5(2)   |
| C(23)-N(3)-Zn(1)  | 119.6(2)   | C(35)-N(5)-Zn(2)  | 120.1(2)   |

**Table S2** Selected bond lengths (Å) and angles (°) for  $[\text{Zn}_2(\text{pdtc})(\text{bpe})_{1.5}]_n$  (**2**)

|                     |            |                   |            |
|---------------------|------------|-------------------|------------|
| Zn(1)-O(5)#1        | 1.976(2)   | Zn(2)-O(4)#1      | 1.947(2)   |
| Zn(1)-N(2)          | 1.988(3)   | Zn(2)-O(7)        | 1.9732(19) |
| Zn(1)-N(1)          | 2.012(2)   | Zn(2)-O(6)#2      | 1.9802(19) |
| Zn(1)-O(1)          | 2.072(2)   | Zn(2)-N(4)        | 2.027(3)   |
| Zn(1)-O(8)          | 2.2623(19) | O(5)#1-Zn(1)-N(2) | 116.85(10) |
| O(5)#1-Zn(1)-N(1)   | 111.64(9)  | N(2)-Zn(1)-N(1)   | 131.48(10) |
| O(5)#1-Zn(1)-O(1)   | 92.58(9)   | N(2)-Zn(1)-O(1)   | 99.21(9)   |
| N(1)-Zn(1)-O(1)     | 79.81(8)   | O(5)#1-Zn(1)-O(8) | 101.63(8)  |
| N(2)-Zn(1)-O(8)     | 93.90(8)   | N(1)-Zn(1)-O(8)   | 74.52(8)   |
| O(1)-Zn(1)-O(8)     | 153.79(8)  | O(4)#1-Zn(2)-O(7) | 123.77(8)  |
| O(4)#1-Zn(2)-O(6)#2 | 101.22(8)  | O(7)-Zn(2)-O(6)#2 | 102.18(8)  |
| O(4)#1-Zn(2)-N(4)   | 99.93(10)  | O(7)-Zn(2)-N(4)   | 112.73(9)  |
| O(6)#2-Zn(2)-N(4)   | 117.54(9)  | C(1)-O(1)-Zn(1)   | 114.18(17) |
| C(7)-O(4)-Zn(2)#1   | 130.19(19) | C(8)-O(5)-Zn(1)#1 | 135.8(2)   |
| C(8)-O(6)-Zn(2)#2   | 119.42(18) | C(9)-O(7)-Zn(2)   | 116.15(19) |
| C(9)-O(8)-Zn(1)     | 113.76(17) | C(2)-N(1)-C(6)    | 122.1(3)   |
| C(2)-N(1)-Zn(1)     | 114.95(19) | C(6)-N(1)-Zn(1)   | 122.30(19) |
| C(10)-N(2)-Zn(1)    | 119.8(2)   | C(14)-N(2)-Zn(1)  | 121.9(2)   |
| C(26)-N(4)-Zn(2)    | 119.9(2)   | C(22)-N(4)-Zn(2)  | 122.5(2)   |

The symmetry code: #1 -x+1, -y+1, -z+2; #2 -x, -y+1, -z+2.

**Table S3** Selected bond lengths (Å) and angles (°) for  $\text{Zn}(\text{Hpztc})(\text{Hbpe})(\text{H}_2\text{O})$  (**3**)

|                    |            |                   |            |
|--------------------|------------|-------------------|------------|
| Zn(1)-N(3)         | 2.0572(19) | Zn(1)-N(1)        | 2.0886(18) |
| Zn(1)-O(1)         | 2.0640(17) | Zn(1)-O(4)        | 2.1172(17) |
| Zn(1)-O(9)         | 2.1313(18) | Zn(1)-O(8)        | 2.2619(16) |
| O(1)-Zn(1)-N(3)    | 118.15(7)  | N(3)-Zn(1)-N(1)   | 163.31(7)  |
| O(1)-Zn(1)-N(1)    | 78.48(7)   | N(3)-Zn(1)-O(4)#1 | 85.57(7)   |
| O(1)-Zn(1)-O(4) #1 | 100.67(6)  | C(1)-O(1)-Zn(1)   | 117.03(14) |
| N(1)-Zn(1)-O(4) #1 | 90.03(7)   | C(4)-O(4)-Zn(1)#1 | 142.75(15) |
| N(3)-Zn(1)-O(9)    | 88.29(7)   | C(8)-O(8)-Zn(1)   | 116.30(14) |
| O(1)-Zn(1)-O(9)    | 88.31(7)   | Zn(1)-O(9)-H(9A)  | 114.4(17)  |
| N(1)-Zn(1)-O(9)    | 93.93(7)   | Zn(1)-O(9)-H(9B)  | 108(2)     |
| O(4)#1-Zn(1)-O(9)  | 170.77(6)  | C(2)-N(1)-Zn(1)   | 114.71(14) |
| N(3)-Zn(1)-O(8)    | 91.21(7)   | C(7)-N(1)-Zn(1)   | 122.73(15) |
| O(1)-Zn(1)-O(8)    | 150.46(6)  | C(13)-N(3)-Zn(1)  | 122.99(16) |
| N(1)-Zn(1)-O(8)    | 72.30(7)   | C(9)-N(3)-Zn(1)   | 119.27(15) |
| O(4)#1-Zn(1)-O(8)  | 83.81(6)   | O(9)-Zn(1)-O(8)   | 89.44(6)   |

The symmetry code: #1 -x+1, -y, -z.

**Table S4** Selected bond lengths (Å) and angles (°) for  $\{[\text{Zn}_2(\text{pztc})(\text{bpe})_2(\text{H}_2\text{O})] \cdot 9\text{H}_2\text{O}\}_n$  (**4**)

|                     |            |                     |            |
|---------------------|------------|---------------------|------------|
| Zn(1)-O(3)          | 2.0629(19) | Zn(1)-O(3)#1        | 2.0629(19) |
| Zn(1)-N(2)#1        | 2.123(2)   | Zn(1)-N(2)          | 2.123(2)   |
| Zn(1)-N(1)#1        | 2.342(2)   | Zn(1)-N(1)          | 2.342(2)   |
| Zn(2)-O(5)#2        | 2.043(2)   | Zn(2)-O(5)          | 2.043(2)   |
| Zn(2)-O(4)          | 2.1220(17) | Zn(2)-O(4)#2        | 2.1220(17) |
| Zn(2)-N(3)          | 2.144(2)   | Zn(2)-N(3)#2        | 2.144(2)   |
| O(3)-Zn(1)-O(3)#1   | 180.000(1) | O(3)-Zn(1)-N(2)#1   | 89.95(9)   |
| O(3)#1-Zn(1)-N(2)#1 | 90.05(9)   | O(3)-Zn(1)-N(2)     | 90.05(9)   |
| O(3)#1-Zn(1)-N(2)   | 89.95(9)   | N(2)#1-Zn(1)-N(2)   | 180.0      |
| O(3)-Zn(1)-N(1)#1   | 103.80(7)  | O(3)#1-Zn(1)-N(1)#1 | 76.20(7)   |
| N(2)#1-Zn(1)-N(1)#1 | 92.47(8)   | N(2)-Zn(1)-N(1)#1   | 87.53(8)   |
| O(3)-Zn(1)-N(1)     | 76.20(7)   | O(3)#1-Zn(1)-N(1)   | 103.80(7)  |
| N(2)#1-Zn(1)-N(1)   | 87.53(8)   | N(2)-Zn(1)-N(1)     | 92.47(8)   |
| N(1)#1-Zn(1)-N(1)   | 180.0      | O(5)#2-Zn(2)-O(5)   | 180.0      |
| O(5)#2-Zn(2)-O(4)   | 86.64(8)   | O(5)-Zn(2)-O(4)     | 93.36(8)   |
| O(5)#2-Zn(2)-O(4)#2 | 93.36(8)   | O(5)-Zn(2)-O(4)#2   | 86.64(8)   |
| O(4)-Zn(2)-O(4)#2   | 180.0      | O(5)#2-Zn(2)-N(3)   | 89.38(13)  |
| O(5)-Zn(2)-N(3)     | 90.63(13)  | O(4)-Zn(2)-N(3)     | 91.42(8)   |
| O(4)#2-Zn(2)-N(3)   | 88.58(8)   | O(5)#2-Zn(2)-N(3)#2 | 90.63(13)  |
| O(5)-Zn(2)-N(3)#2   | 89.37(13)  | O(4)-Zn(2)-N(3)#2   | 88.58(8)   |
| O(4)#2-Zn(2)-N(3)#2 | 91.42(8)   | N(3)-Zn(2)-N(3)#2   | 180.0      |
| C(4)-O(3)-Zn(1)     | 119.99(15) | C(4)-O(4)-Zn(2)     | 132.01(16) |
| Zn(2)-O(5)-H(5A)    | 122(2)     | Zn(2)-O(5)-H(5B)    | 116(2)     |
| C(3)-N(1)-Zn(1)     | 107.51(15) | C(2)-N(1)-Zn(1)     | 133.72(17) |
| C(5)-N(2)-Zn(1)     | 122.53(18) | C(9)-N(2)-Zn(1)     | 119.74(18) |
| C(15)-N(3)-Zn(2)    | 120.73(19) | C(11)-N(3)-Zn(2)    | 121.7(2)   |

The symmetry code: #1 -x+2, -y+1, -z; #2 -x+1, -y+2, -z.

**Table S5** Selected bond lengths (Å) and angles (°) for  $\{[\text{Cu}_2(\text{pdtc})(\text{bpy})(\text{H}_2\text{O})_2] \cdot 3\text{H}_2\text{O}\}_n$  (**5**)

|                     |            |                    |            |
|---------------------|------------|--------------------|------------|
| Cu(1)-N(1)          | 1.916(4)   | Cu(1)-N(2)         | 1.952(4)   |
| Cu(1)-O(2)          | 2.012(3)   | Cu(1)-O(3)         | 2.028(3)   |
| Cu(1)-O(9)          | 2.289(4)   | Cu(2)-O(10)        | 1.952(3)   |
| Cu(2)-O(6)#1        | 1.961(3)   | Cu(2)-O(7)         | 1.968(3)   |
| Cu(2)-N(3)#2        | 2.006(3)   | O(6)-Cu(2)#3       | 1.961(3)   |
| N(1)-Cu(1)-N(2)     | 167.88(19) | N(1)-Cu(1)-O(2)    | 80.89(13)  |
| N(2)-Cu(1)-O(2)     | 102.13(13) | N(1)-Cu(1)-O(3)    | 80.33(13)  |
| N(2)-Cu(1)-O(3)     | 94.42(13)  | O(2)-Cu(1)-O(3)    | 159.01(13) |
| N(1)-Cu(1)-O(9)     | 101.14(15) | N(2)-Cu(1)-O(9)    | 90.53(16)  |
| O(2)-Cu(1)-O(9)     | 92.13(13)  | O(3)-Cu(1)-O(9)    | 100.62(13) |
| O(10)-Cu(2)-O(6)#1  | 87.02(13)  | O(10)-Cu(2)-O(7)   | 89.19(12)  |
| O(6)#1-Cu(2)-O(7)   | 170.83(15) | O(10)-Cu(2)-N(3)#2 | 171.64(18) |
| O(6)#1-Cu(2)-N(3)#2 | 89.69(13)  | O(7)-Cu(2)-N(3)#2  | 92.91(13)  |
| C(1)-O(2)-Cu(1)     | 114.3(2)   | C(7)-O(3)-Cu(1)    | 114.9(2)   |

|                    |          |                    |          |
|--------------------|----------|--------------------|----------|
| C(9)-O(6)-Cu(2)#3  | 120.5(3) | C(8)-O(7)-Cu(2)    | 116.3(3) |
| C(8)-O(7)-Cu(2)    | 116.3(3) | Cu(1)-O(9)-H(9A)   | 120.2    |
| Cu(1)-O(9)-H(9B)   | 119.8    | Cu(2)-O(10)-H(10A) | 120.0    |
| Cu(2)-O(10)-H(10B) | 120.0    | C(6)-N(1)-Cu(1)    | 117.0(3) |
| C(2)-N(1)-Cu(1)    | 118.2(3) | C(10)-N(2)-Cu(1)   | 119.2(3) |
| C(14)-N(2)-Cu(1)   | 122.7(3) | C(17)-N(3)-Cu(2)#4 | 120.5(3) |
| C(18)-N(3)-Cu(2)#4 | 122.7(3) |                    |          |

The symmetry code: #1  $x+1/2, -y+5/2, z+1/2$ ; #2  $x+1/2, -y+3/2, z+1/2$ ; #3  $x-1/2, -y+5/2, z-1/2$ ; #4  $x-1/2, -y+3/2, z-1/2$ .

**Table S6** Selected bond lengths (Å) and angles (°) for  $\{[\text{Cu}_2(\text{pdtc})(\text{bpy})(\text{H}_2\text{O})_2] \cdot 2\text{H}_2\text{O}\}_n$  (**6**)

|                    |            |                     |            |
|--------------------|------------|---------------------|------------|
| Cu(1)-N(1)         | 1.9141(18) | Cu(1)-N(3)#1        | 1.9537(18) |
| Cu(1)-O(1)         | 2.0288(16) | Cu(1)-O(8)          | 2.0300(17) |
| Cu(1)-O(3)#2       | 2.1848(17) | Cu(2)-O(6)          | 1.9412(16) |
| Cu(2)-O(4)#3       | 1.9463(15) | Cu(2)-N(2)          | 2.0183(19) |
| Cu(2)-O(9)         | 2.0443(17) | Cu(2)-O(10)         | 2.2158(18) |
| O(3)-Cu(1)#2       | 2.1848(17) | O(4)-Cu(2)#4        | 1.9463(15) |
| N(3)-Cu(1)#5       | 1.9537(18) | N(1)-Cu(1)-N(3)#1   | 169.09(8)  |
| N(1)-Cu(1)-O(1)    | 80.42(7)   | N(3)#1-Cu(1)-O(1)   | 97.11(7)   |
| N(3)#1-Cu(1)-O(8)  | 99.97(7)   | O(1)-Cu(1)-O(8)     | 159.52(6)  |
| N(1)-Cu(1)-O(3)#2  | 97.66(7)   | N(3)#1-Cu(1)-O(3)#2 | 93.24(7)   |
| O(1)-Cu(1)-O(3)#2  | 100.39(6)  | O(1)-Cu(1)-O(3)#2   | 100.39(6)  |
| O(8)-Cu(1)-O(3)#2  | 89.87(7)   | O(6)-Cu(2)-O(4)#3   | 163.67(7)  |
| O(6)-Cu(2)-N(2)    | 91.14(7)   | O(4)#3-Cu(2)-N(2)   | 94.58(7)   |
| O(6)-Cu(2)-O(9)    | 89.42(7)   | O(4)#3-Cu(2)-O(9)   | 84.59(7)   |
| N(2)-Cu(2)-O(9)    | 178.77(8)  | O(6)-Cu(2)-O(10)    | 90.80(7)   |
| O(4)#3-Cu(2)-O(10) | 103.37(7)  | N(2)-Cu(2)-O(10)    | 98.84(7)   |
| O(9)-Cu(2)-O(10)   | 82.25(7)   | C(1)-O(1)-Cu(1)     | 115.06(14) |
| C(8)-O(3)-Cu(1)#2  | 144.33(15) | C(8)-O(4)-Cu(2)#4   | 120.02(14) |
| C(9)-O(6)-Cu(2)    | 114.14(14) | C(7)-O(8)-Cu(1)     | 114.46(14) |
| Cu(2)-O(9)-H(9A)   | 109(2)     | Cu(2)-O(9)-H(9B)    | 105(2)     |
| Cu(2)-O(10)-H(10A) | 110(2)     | Cu(2)-O(10)-H(10B)  | 108(2)     |
| C(6)-N(1)-Cu(1)    | 118.26(15) | C(2)-N(1)-Cu(1)     | 118.03(15) |
| C(10)-N(2)-Cu(2)   | 123.52(15) | C(14)-N(2)-Cu(2)    | 119.07(15) |
| C(18)-N(3)-Cu(1)#5 | 119.54(15) | C(17)-N(3)-Cu(1)#5  | 122.12(16) |

The symmetry code: #1  $-x+1/2, y-1/2, -z-1/2$ ; #2  $-x+2, -y, -z$ ; #3  $-x+3/2, y+1/2, -z+1/2$ ; #4  $-x+3/2, y-1/2, -z+1/2$ ; #5  $-x+1/2, y+1/2, -z-1/2$ .

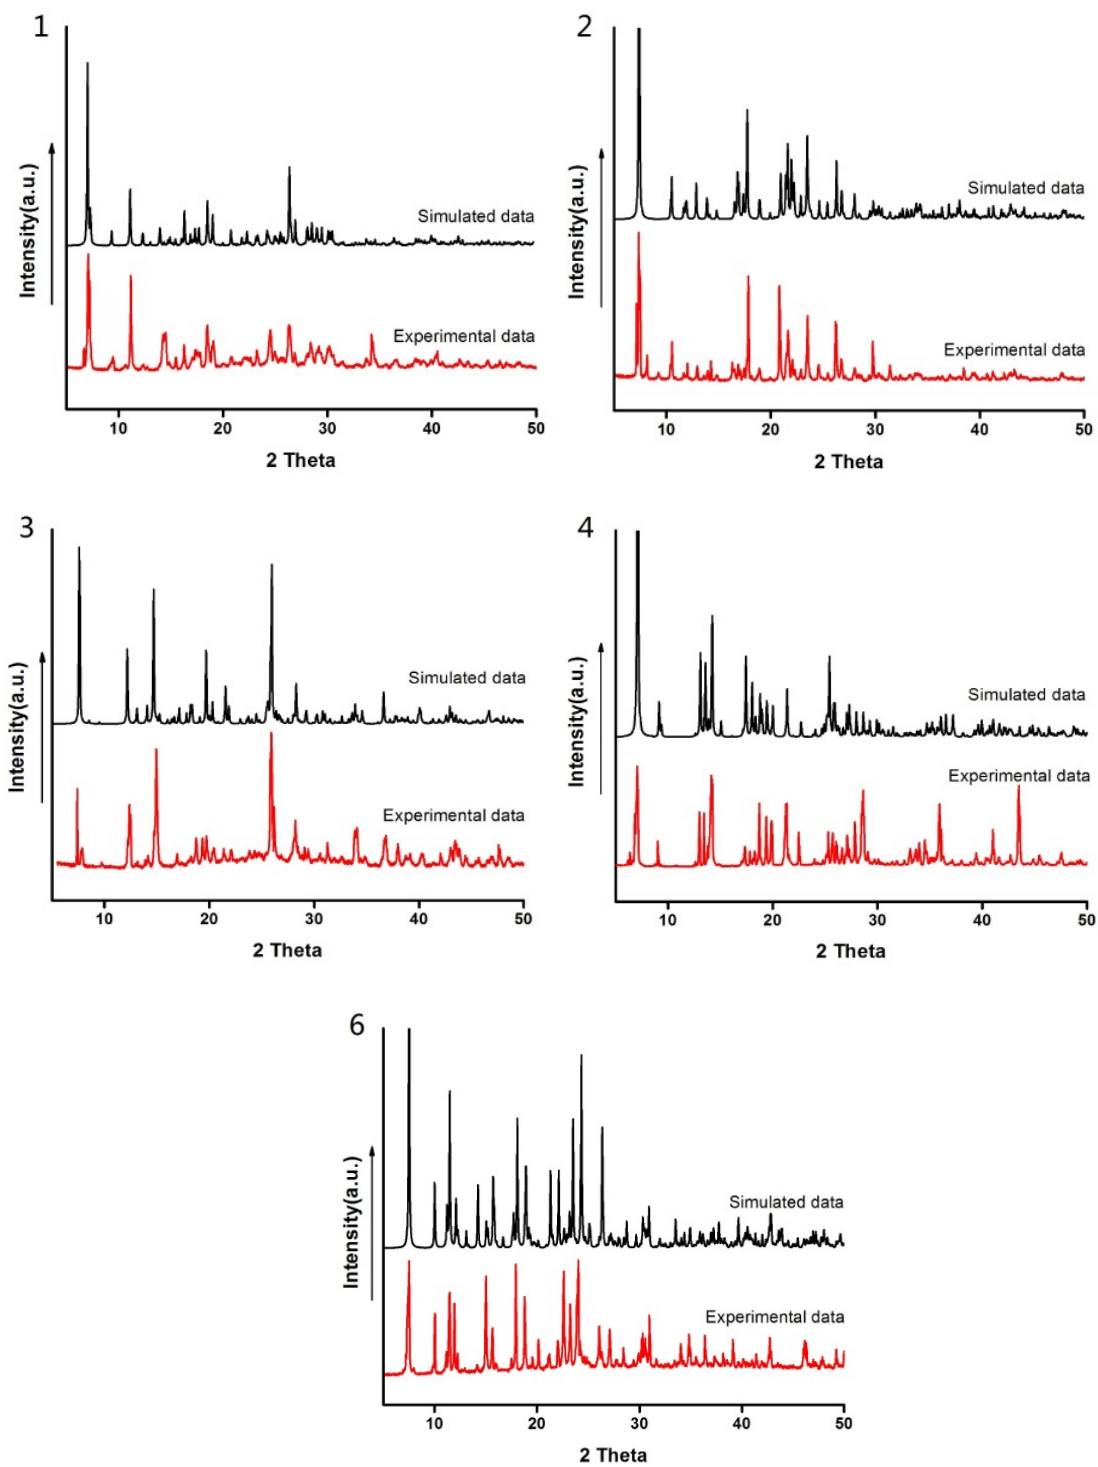

Fig. S1 PXRD patterns of compounds 1, 2, 3, 4 and 6.

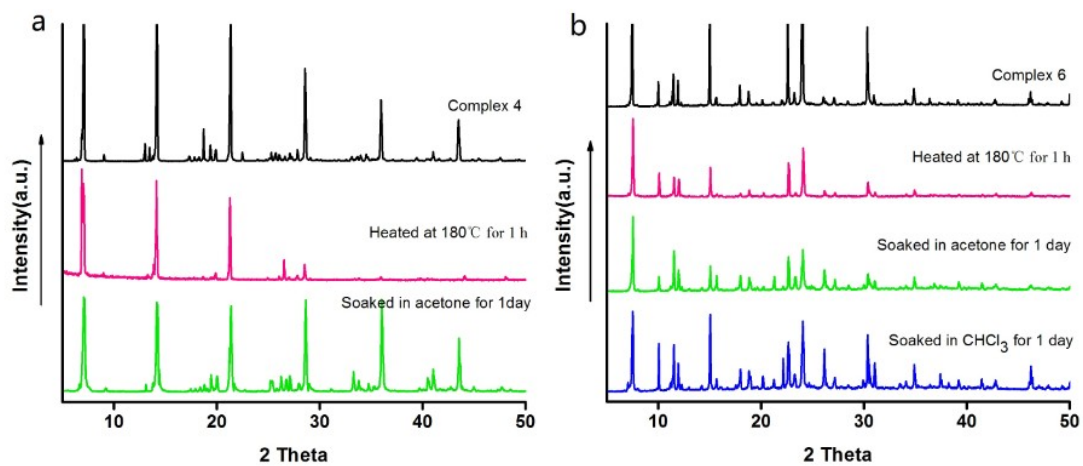

**Fig. S2(a)** PXRd patterns of **4** and heated at 180 °C for 1 h and after being soaked in acetone for 1 day. **(b)** PXRd patterns of **6** and after being heated at 180 °C for 1 h and soaked in acetone or chloroform for 1 day.
